# Supplementary material for: DNase I functional microgels for neutrophil extracellular trap disruption
Source: Royal Society of Chemistry journal article supplement (doi:10.1039/d1bm01591e), 2021-11-23
Supplement: d1bm01591e5.pdf [file d1bm01591e5.pdf]

## Supporting Information

# DNase I Functional Microgels for Neutrophil Extracellular Trap Disruption

*Aisa Hosseinejad<sup>1</sup>, Nadine Ludwig<sup>2</sup>, Ann-Katrin Wienkamp<sup>2</sup>, Rahul Rimal<sup>1</sup>, Christian Bleilevens<sup>3</sup>, Rolf Rossaint<sup>3</sup>, Jan Rossaint<sup>2</sup>, Smriti Singh<sup>1,4\*</sup>*

A. Hosseinejad, R. Rimal, Dr. S. Singh

<sup>1</sup> DWI—Leibniz-Institute for Interactive Materials e.V.

Forckenbeckstr. 50, 52056 Aachen, Germany

Prof. Dr. J. Rossaint, N. Ludwig, A. K. Wienkamp

<sup>2</sup> Department of Anesthesiology, Intensive Care and Pain Medicine, University Hospital Münster, Albert-Schweitzer-Campus 1, Bldg. A1, 48149 Münster, Germany

PD Dr. Christian Bleilevens, Prof. R. Rossaint

<sup>3</sup> The Department of Anaesthesiology of the University Hospital RWTH Aachen

Pauwelsstraße 30, 52074 Aachen, Germany

Dr. S. Singh

<sup>4</sup> Max-Planck-Institut für medizinische Forschung

Jahnstraße 29, 69120 Heidelberg, Germany

smriti.singh@mr.mpg.de

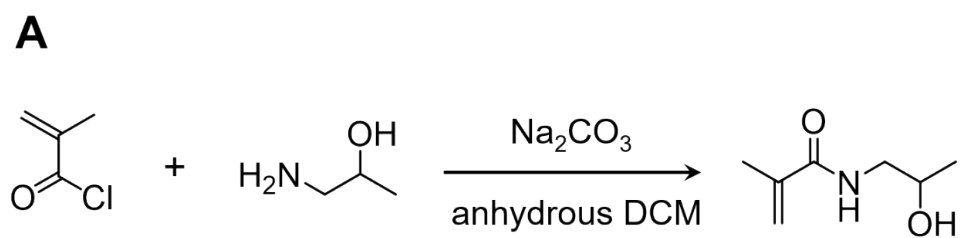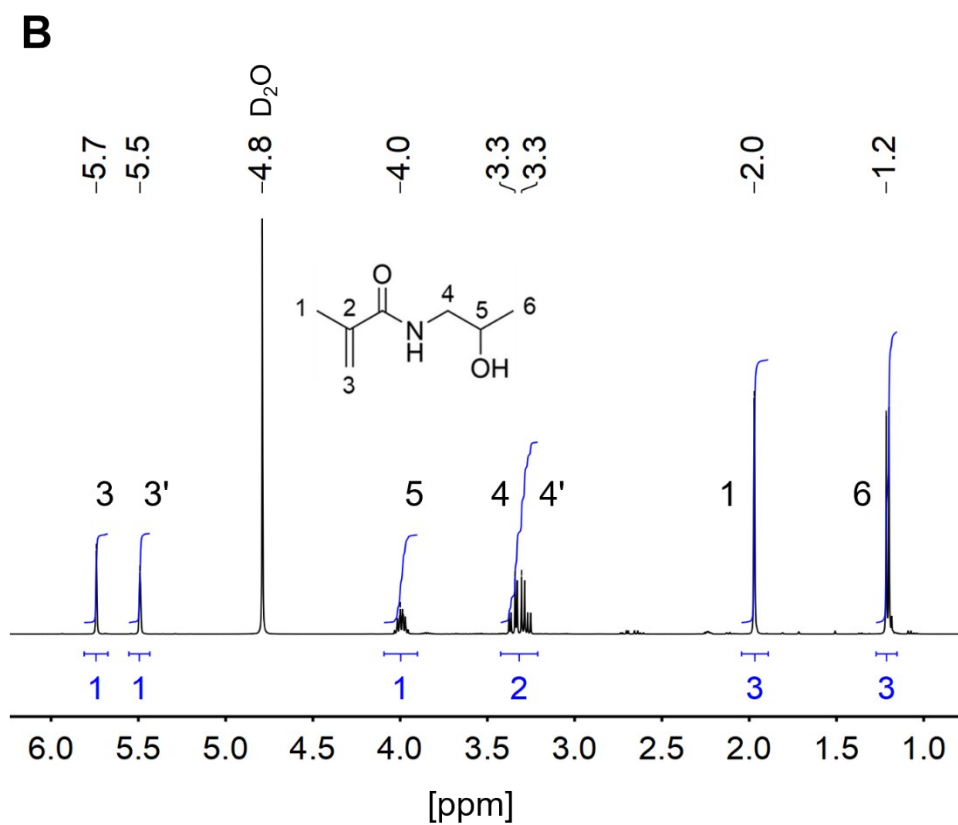

**Figure S1.** (A) Synthesis route and (B) <sup>1</sup>H NMR (300 MHz, D<sub>2</sub>O) of HPMA.

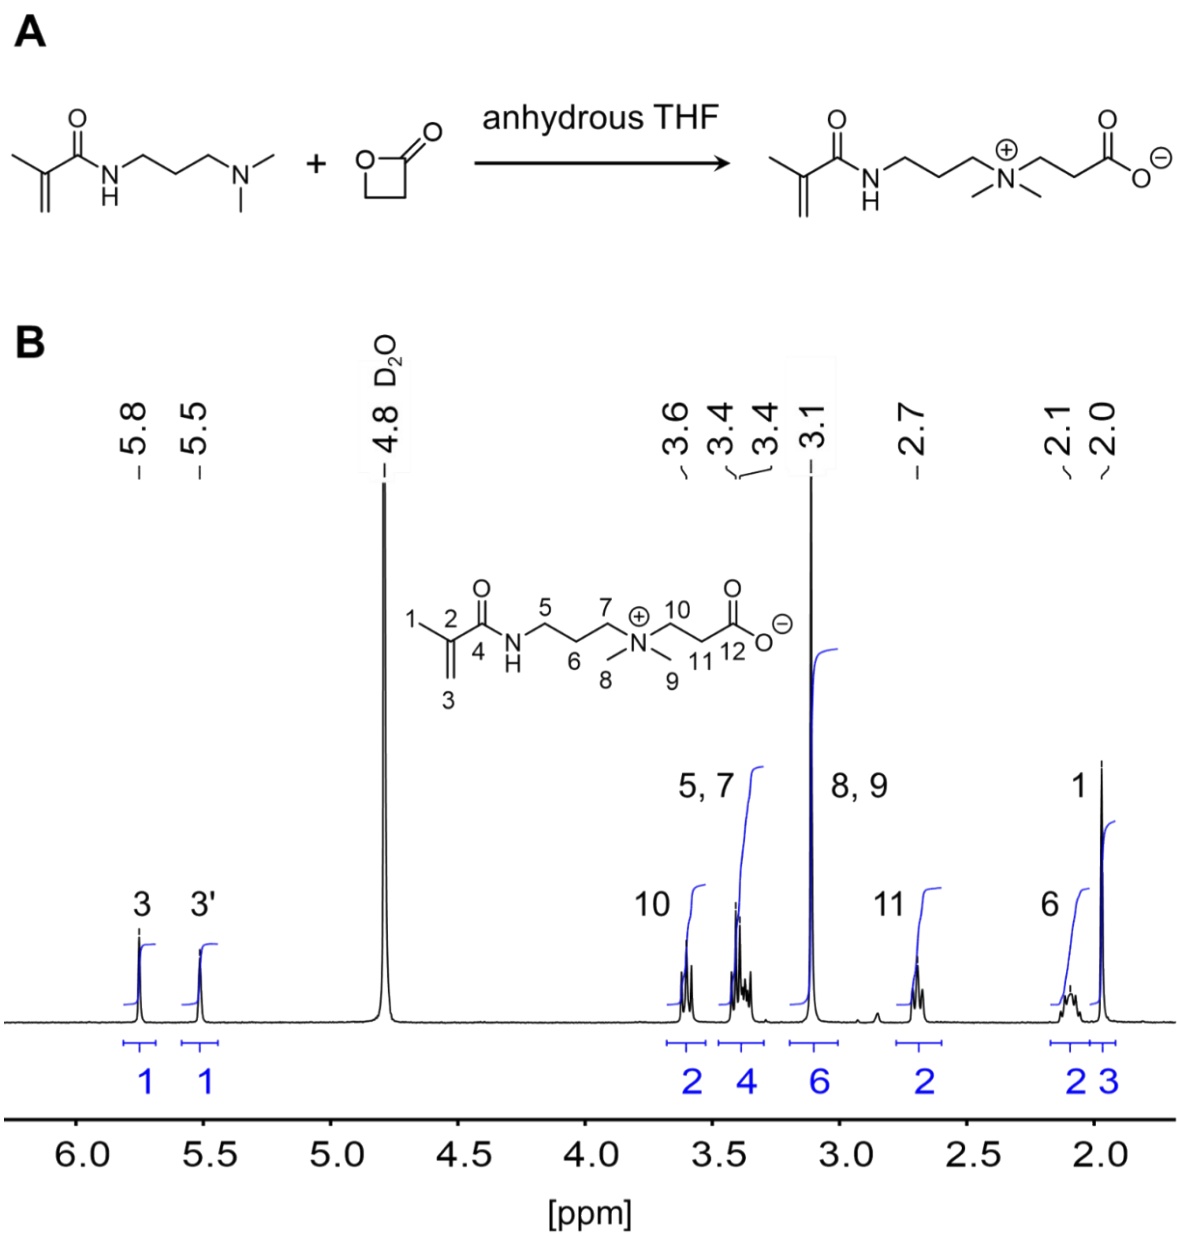

**Figure S2.** <sup>1</sup>H NMR (D<sub>2</sub>O) of CBMAA from the inset synthesis route.

**Table S1.** Optimal parameters of the miniemulsion

| aqueous phase | organic phase | volume ratio | surfactants                                         | weight ratio of the surfactant mixture |        |
|---------------|---------------|--------------|-----------------------------------------------------|----------------------------------------|--------|
| PBS           | Hexadecane    | 1:10         | Span 80<br>(HLB = 4.3)<br><br>Tween 80<br>(HLB =15) | Span 80: Tween 80 3:1<br>(HLB = 7)     |        |
| monomer       | crosslinker   |              | initiator                                           |                                        |        |
| HPMA          | 80 mol%       | MBAA         | 3 mol%                                              | AMPA                                   | 3 mol% |
| CBMAA         | 14 mol%       |              | 6 mol%                                              |                                        |        |
|               |               |              | 8 mol%                                              |                                        |        |
|               |               |              | 10 mol%                                             |                                        |        |

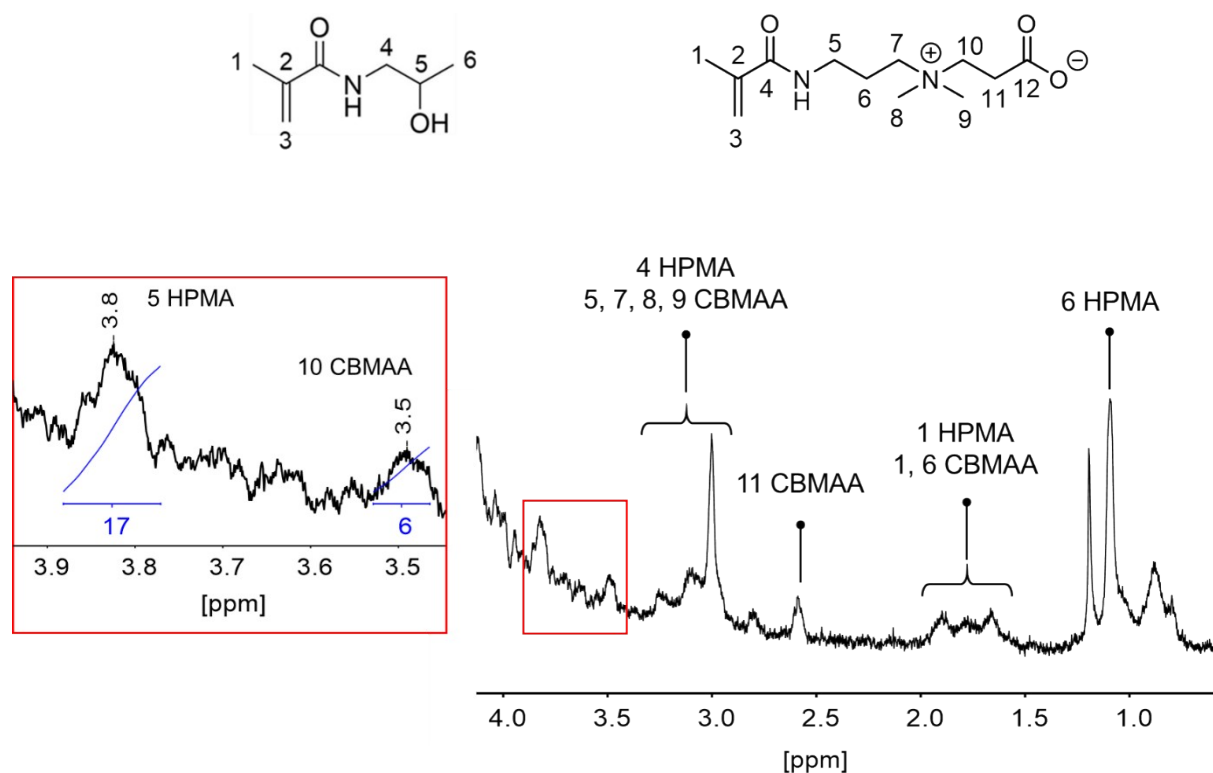

**Figure S3.**  $^1\text{H}$  NMR of p(HPMA-*co*-CBMAA) microgels indicating the characteristic peaks. The inset shows the molar ratio of HPMA:CBMAA as set in the feed.

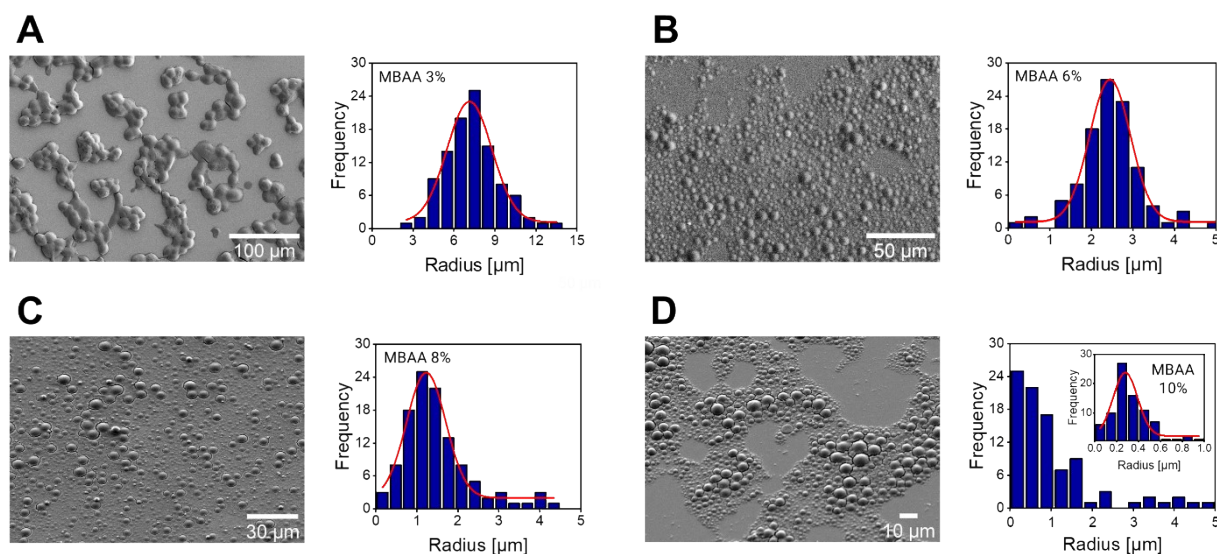

**Figure S4.** SEM and size distribution of microgels respecting the increase of crosslinker concentration in mmol%: **(A)** 3% MBAA, **(B)** 6%, MBAA, **(C)** 8% MBAA, **(D)** 10% MBAA (The size distribution inset shows that the microgels with size below 1  $\mu\text{m}$  are the major population). Particle diameter was measured by ImageJ software using the given SEM images. The frequency distribution of particle size was plotted with Origin software. X-axis represents the particle radius in micrometer, while y-axis represents particle counts at a given radius. The red fitting curve shows the Gaussian distribution of the microgels.

**Table S2.** Summary table from the measurement of the particle size distribution including the average radius (R) and particle counts (N) for each microgel preparation with respect to the amount of crosslinker.

|                          | <b>MBAA 3%</b> | <b>MBAA 6%</b> | <b>MBAA 8%</b> | <b>MBAA 10%</b> |
|--------------------------|----------------|----------------|----------------|-----------------|
| Size [R, $\mu\text{m}$ ] | $7.1 \pm 1.6$  | $2.5 \pm 0.5$  | $1.2 \pm 0.5$  | $0.3 \pm 0.1$   |
| N                        | 104            | 104            | 113            | 82              |

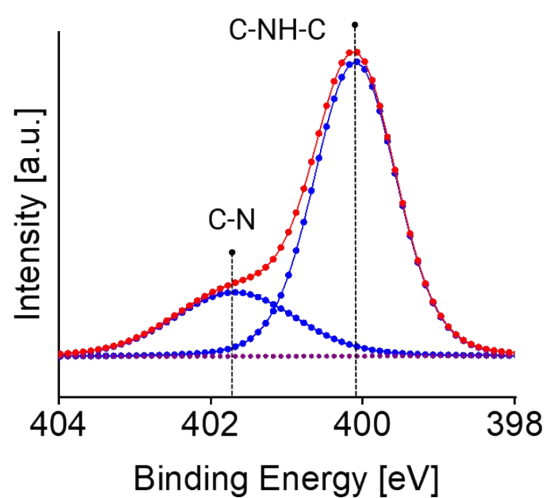

**Figure S5.** High resolution N 1s XPS spectra of native DNase I showing the characteristic structural peaks.

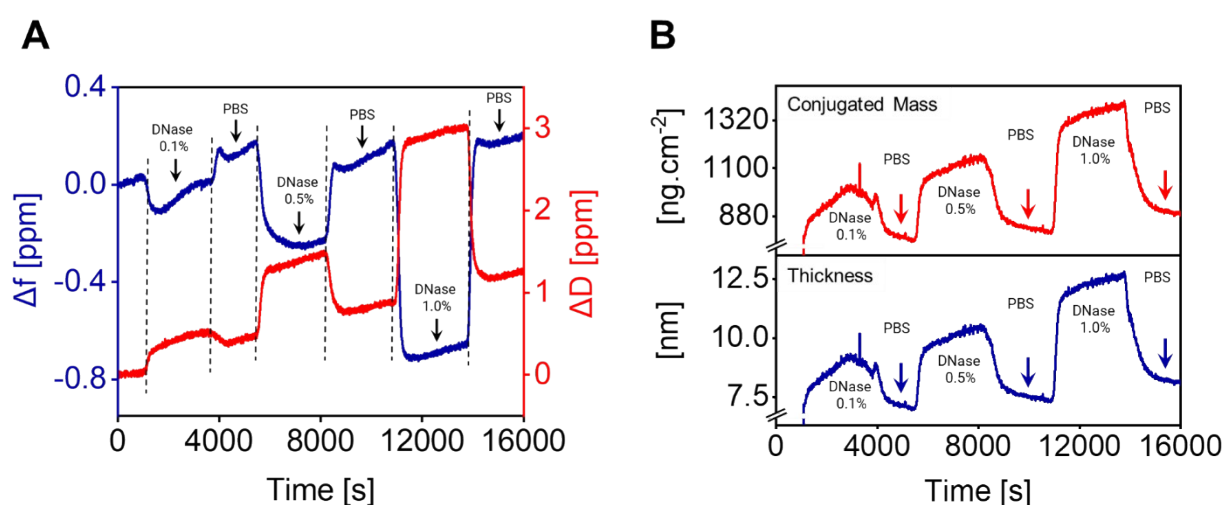

**Figure S6.** (A) The antifouling assay of EDC/sulfo-NHS activated p(HPMA-co-CBMAA) microgels against different concentrations of DNase I solutions (0.1, 0.5, 1.0 wt% in PBS pH 7.4) evaluated by a long-term QCM-D measurement. The results show oscillating changes of frequency (blue) and energy dissipation (red) by alternating the use of DNase I solution and PBS (pH 7.4). (B) Modeled QCM-D data for the representation of conjugated mass (red) and layer thickness (blue) on the quartz sensor.

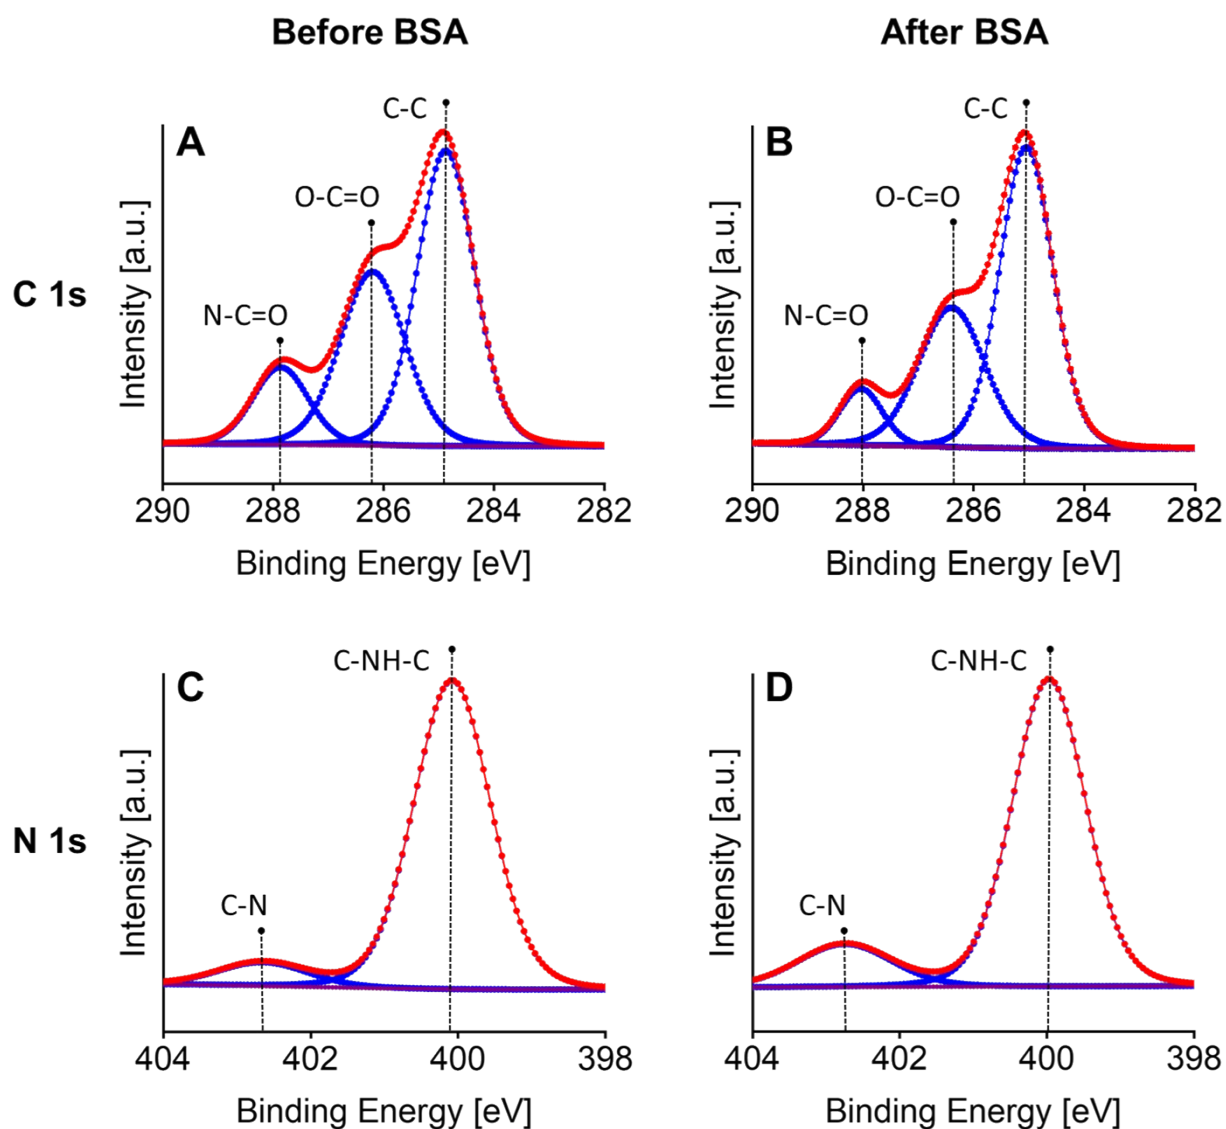

**Figure S7.** High resolution C 1s and N 1s XPS spectra of the DNase I microgels showing the characteristic structural peaks respectively (A, C) before and (B, D) after exposure to BSA.

**Table S3.** Elemental composition of microgels before and after BSA

|            | C 1s         | N 1s         | O 1s         |
|------------|--------------|--------------|--------------|
| Before BSA | 51.5 ± 1.3 % | 9.8 ± 1.4 %  | 38.7 ± 0.3 % |
| After BSA  | 51.3 ± 0.4 % | 10.1 ± 0.9 % | 38.6 ± 0.5 % |

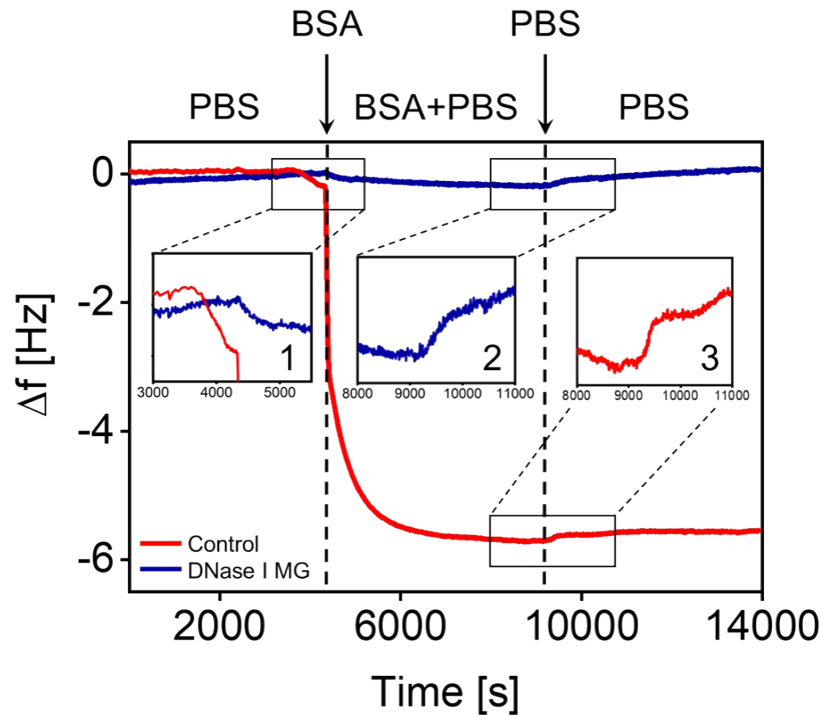

**Figure S8.** The antifouling assay of DNase I MGs coated on a gold sensor and a bare gold surface as a control by a long-term QCM-D measurement. The results show oscillating changes of frequency by addition of 0.01% BSA (in PBS pH 5.0) followed by a washing step using PBS (pH 5.0).

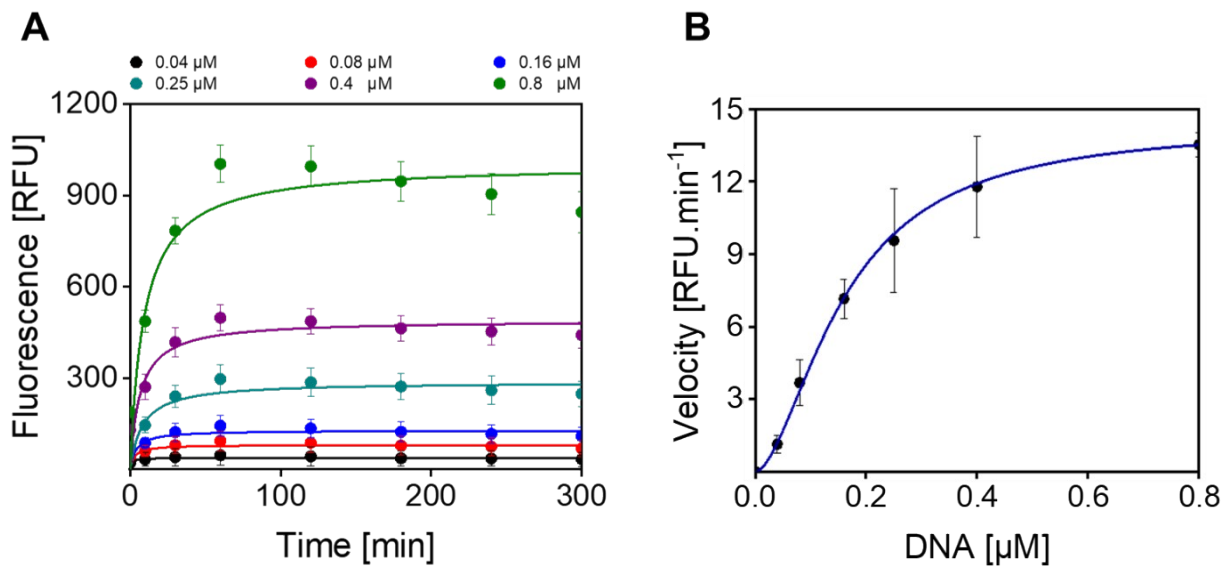



**Figure S9.** (A) Quantitative analysis of free DNase I kinetics by measuring the fluorescence over time using different substrate concentrations. Reactions contained 8  $\mu\text{M}$  of the free enzyme. Fluorescence was normalized by subtraction of background fluorescence observed in the absence of enzyme. (B) The velocity data were fitted to the Hill model by non-linear regression and  $V_{\text{max}}$  and  $K_{\text{Hill}}$  were calculated to be  $14.34001 \pm 0.186$  and  $0.15945 \pm 0.006 \mu\text{M}$  respectively. The error bars represent the standard error of the regression (n=3-4).

To estimate the enzymatic activity 8  $\mu\text{M}$  of free DNase I was used. The concentration of free DNase used was equivalent to the immobilized DNase in 1 mg mL<sup>-1</sup> of the DNase I MG. The changes in fluorescence intensity were recorded for 5 hr at 37 °C after incubation of free DNase I with different concentrations of the model DNA substrate. As shown in **Figure S9A** the fluorescence intensity over time was increased with the increase in concentration of the substrate. A plateau was attained after a full cleavage at a substrate concentration of 0.8  $\mu\text{M}$  making the substrate concentration rate-limiting. The plot of velocity of the enzyme (RFU·min<sup>-1</sup>) as a function of the substrate concentration shows a sigmoidal curve contrary to the rectangular parabola given by Michaelis-Menten kinetics. Such sigmoidal curve shows cooperative binding of the enzyme.<sup>14</sup> Using Hill equation  $V_{\text{max}}$  and  $K_{\text{Hill}}$  of DNase I was calculated to be  $14.34001 \pm 0.186$  and  $0.15945 \pm 0.006 \mu\text{M}$  respectively.

**Video S1.** Stimulated PMNs using phorbol 12-myristate13-acetate (PMA) to produce NETs.

**Video S2.** Stimulated PMNs in presence of the DNase I MGs. The disappearance of the orange spots shows the digestion of released NETs by the DNase I MGs.

**Video S3.** Unstimulated PMNs in presence of the DNase I MGs. The orange spots show the expelled NETs staining with the cell impermeable DNA dye SYTOX<sup>TM</sup> orange.

**Video S4.** Unstimulated PMNs as a control group indicating the characteristic shape with Hoechst blue staining of the nuclei.
